# Supplementary material for: Development of a Precision Medicine Workflow in Hematological Cancers, Aalborg University Hospital, Denmark
Source: PubMed Central journal article supplement (PMC7073219; doi:10.3390/cancers12020312), 2020-01-29
Supplement: cancers-12-00312-s001.pdf [file cancers-12-00312-s001.pdf]

## Supplementary Material

Boxplots of DNA and RNA Purification yields from MFC sorted samples grouped by patient group or sample type are shown in Figure S1.

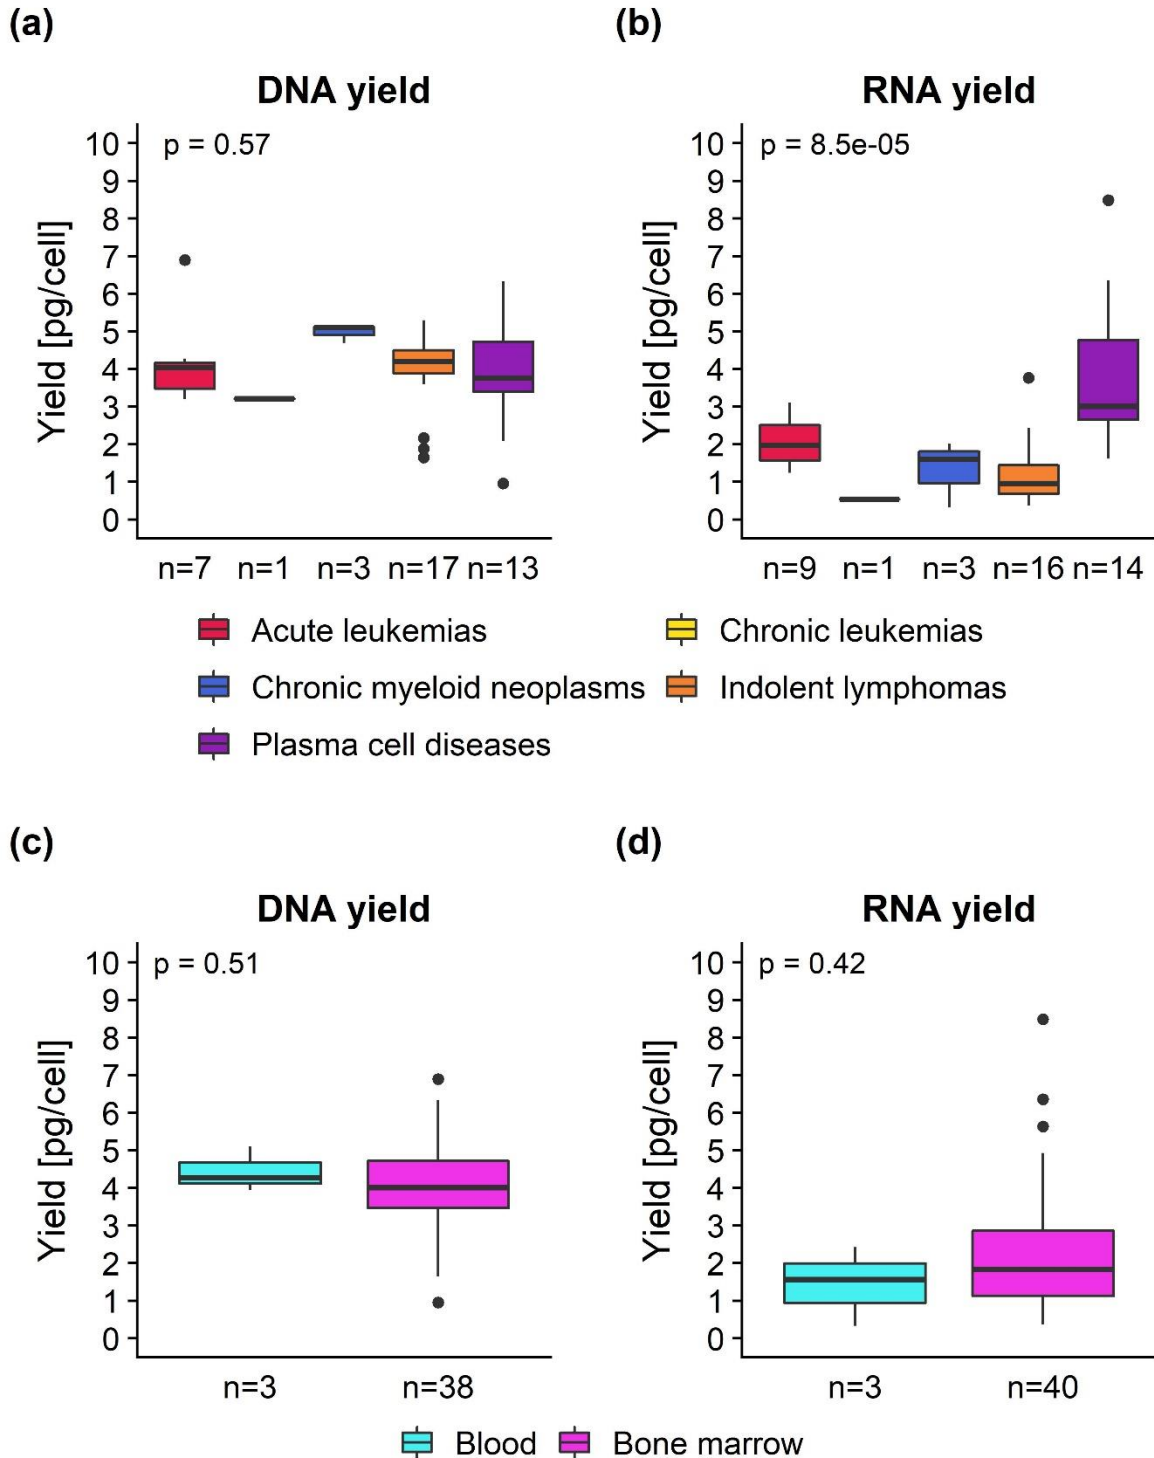

**Figure S1.** DNA (panels (a) and (c)) and RNA (panels (b) and (d)) yields from MFC sorted samples divided into different patient groups (panels (a) and (b)) or sample types (panels (c) and (d)). The p-values indicate, whether the mean values are equal among all groups (by one-way ANOVA). If multiple fractions were collected after sorting, only the sequenced one is represented in the figure.

**Table S1.** Variant interpretation results. The highest clinical assessment in each of the three categories; overall, therapeutic, and prognostic and the corresponding gene(s) of each sample subjected to variant interpretation is given. The MSI status and TMB for each sample is also shown. NA = Sample did not have a gene with a clinical relevance  $\geq 2$ . Explanation of each Criteria ID is given in the sheet Value explanation. \* TMB is given as no. mutations/Mb. \*\* MSI status is given as percentage of instable microsatellites.

| Patient ID | Diagnosis | Diagnosis Group   | Highest assessment | Genes providing highest assessment | Highest therapeutic assessment | Therapeutic significant genes | Highest prognostic assessment | Prognostic significant genes | TMB * | MSI [%] ** |
|------------|-----------|-------------------|--------------------|------------------------------------|--------------------------------|-------------------------------|-------------------------------|------------------------------|-------|------------|
| 005-1      | AML       | Acute leukemias   | 1A                 | RUNX1                              | 2C-R2                          | RUNX1                         | 1A-P                          | RUNX1                        | 0.179 | 0.44       |
| 076-1      | AML       | Acute leukemias   | 1A                 | IDH2 NPM1<br>DNMT3A                | 1A-S1                          | IDH2                          | 1A-P                          | IDH2 NPM1<br>DNMT3A          | 0.864 | 1.01       |
| 144-1      | AML       | Acute leukemias   | 2D                 | NUP98-NSD1                         | NA                             | NA                            | NA                            | NA                           | 0     | 0.65       |
| 156-2      | AML       | Acute leukemias   | 3                  | PLAGL2 EEF1A1-<br>TYK2 BCL2L1      | NA                             | NA                            | NA                            | NA                           | 0.215 | 1.24       |
| 239-1      | AML       | Acute leukemias   | 1A                 | TP53                               | 1A-S2                          | TP53                          | 1B-P                          | TP53                         | 0.564 | 0.2        |
| 298-1      | AML       | Acute leukemias   | 1A                 | DNMT3A IDH1                        | 1A-S1                          | IDH1                          | 1A-P                          | DNMT3A IDH1                  | 0.488 | 0.06       |
| 349-1      | ALL       | Acute leukemias   | 3                  | PRDM2 NT5C2<br>TSC2                | NA                             | NA                            | NA                            | NA                           | 1.751 | 1.38       |
| 001-1      | CLL       | Chronic leukemias | 1A                 | TP53                               | 1A-S1                          | TP53                          | 1A-P                          | TP53                         | 0.564 | 0          |
| 002-1      | CLL       | Chronic leukemias | 3                  | BCOR B2M-CXCR4<br>FBXW7            | NA                             | NA                            | NA                            | NA                           | 1     | 0          |
| 107-1      | CLL       | Chronic leukemias | 2C                 | TET2                               | 2C-S2 2C-R2                    | TET2                          | NA                            | NA                           | 0.511 | 0.01       |
| 124-1      | CLL       | Chronic leukemias | 3                  | PIM3-SCO2 CIITA-<br>DEXI           | NA                             | NA                            | NA                            | NA                           | 0.073 | 0.01       |
| 136-1      | CLL       | Chronic leukemias | 3                  | CIITA-DEXI EGR2<br>FBXW7           | NA                             | NA                            | NA                            | NA                           | 0.601 | 0          |
| 138-1      | CLL       | Chronic leukemias | 1A                 | NOTCH1 TP53                        | 1A-S1                          | TP53                          | 1A-P                          | NOTCH1 TP53                  | 1.131 | 0          |

|       |        |                           |    |                                        |       |        |      |            |       |      |
|-------|--------|---------------------------|----|----------------------------------------|-------|--------|------|------------|-------|------|
| 147-1 | CLL    | Chronic leukemias         | 3  | RPS15                                  | NA    | NA     | NA   | NA         | 0.62  | 0    |
| 158-1 | CLL    | Chronic leukemias         | 1A | TP53 SF3B1                             | 1A-S1 | TP53   | 1A-P | TP53 SF3B1 | 0.656 | 0.01 |
| 164-1 | CLL    | Chronic leukemias         | 3  | PTPN13                                 | NA    | NA     | NA   | NA         | 0.693 | 0    |
| 168-1 | SLL    | Chronic leukemias         | 2C | KMT2D NOTCH1                           | 2C-R2 | NOTCH1 | NA   | NA         | 0.693 | 0    |
| 234-1 | CLL    | Chronic leukemias         | 2C | ATM                                    | 2C-CT | ATM    | NA   | NA         | 0.839 | 0.09 |
| 249-1 | CLL    | Chronic leukemias         | 3  | ACTB-GNAS CIITA-<br>DEXI               | NA    | NA     | NA   | NA         | 0.036 | 0    |
| 383-1 | T-LGLL | Chronic leukemias         | 3  | IGF1R STAT3<br>KMT2A TCF25-<br>ANKRD11 | NA    | NA     | NA   | NA         | 0.753 | 0.33 |
| 261-1 | PV     | Chronic myeloid neoplasms | 3  | INSR                                   | NA    | NA     | NA   | NA         | 0.072 | 0.17 |
| 287-1 | MDS    | Chronic myeloid neoplasms | NA | NA                                     | NA    | NA     | NA   | NA         | 0.072 | 0.04 |
| 397-1 | MDS    | Chronic myeloid neoplasms | 1A | RUNX1                                  | 2C-R2 | RUNX1  | 1A-P | RUNX1      | 0.681 | 0.2  |
| 015-1 | DLBCL  | Aggressive lymphomas      | 2C | EZH2                                   | 2C-R2 | EZH2   | NA   | NA         | 2.553 | 0    |
| 019-1 | DLBCL  | Aggressive lymphomas      | 2C | ATM EZH2                               | 2C-R2 | EZH2   | NA   | NA         | 1.24  | 0.05 |
| 087-1 | DLBCL  | Aggressive lymphomas      | 3  | INSL3-JAK3 RCC1-<br>IRF4 ACTB-GNAS     | NA    | NA     | NA   | NA         | 0.036 | 0.16 |
| 123-1 | DLBCL  | Aggressive lymphomas      | 2C | CREBBP EZH2                            | 2C-R2 | EZH2   | NA   | NA         | 2.881 | 0.09 |
| 123-2 | DLBCL  | Aggressive lymphomas      | 2C | CREBBP EZH2                            | 2C-R2 | EZH2   | NA   | NA         | 3.465 | 0.16 |

|       |       |                      |    |                                        |             |              |      |          |       |      |
|-------|-------|----------------------|----|----------------------------------------|-------------|--------------|------|----------|-------|------|
| 155-1 | DLBCL | Aggressive lymphomas | 3  | ARID1B AFF3-MAPKAP1 TP53               | NA          | NA           | NA   | NA       | 0.766 | 0.03 |
| 155-2 | DLBCL | Aggressive lymphomas | 2C | MYC                                    | NA          | NA           | NA   | NA       | 1.183 | 0.52 |
| 173-1 | DLBCL | Aggressive lymphomas | 2C | ATM                                    | 2C-CT       | ATM          | NA   | NA       | 1.058 | 0.15 |
| 183-1 | PTCL  | Aggressive lymphomas | 2C | MBNL1-BCL6                             | NA          | NA           | NA   | NA       | 0.656 | 0.01 |
| 189-1 | DLBCL | Aggressive lymphomas | 2C | KMT2D TP53                             | 2C-S1       | TP53         | NA   | NA       | 2.261 | 0.5  |
| 196-1 | DLBCL | Aggressive lymphomas | 2C | MYD88                                  | 2C-CT       | MYD88        | NA   | NA       | 3.83  | 0.33 |
| 292-1 | DLBCL | Aggressive lymphomas | 2C | MYD88                                  | 2C-CT       | MYD88        | NA   | NA       | 1.721 | 0.4  |
| 316-1 | PTCL  | Aggressive lymphomas | NA | NA                                     | NA          | NA           | NA   | NA       | 0     | 0.14 |
| 321-1 | DLBCL | Aggressive lymphomas | 2C | SRSF2 CREBBP KMT2D                     | 2C-R2       | SRSF2        | NA   | NA       | 0.985 | 0.05 |
| 321-2 | DLBCL | Aggressive lymphomas | 2C | KMT2D CREBBP                           | 2C-CT       | KMT2D CREBBP | NA   | NA       | 1.714 | 0.39 |
| 333-1 | DLBCL | Aggressive lymphomas | 2C | CDKN2A KMT2D CIITA-BCL6                | 2C-CT       | CDKN2A KMT2D | NA   | NA       | 3.55  | 0.35 |
| 333-2 | DLBCL | Aggressive lymphomas | 2C | KMT2D CDKN2A CIITA-BCL6                | 2C-CT       | KMT2D CDKN2A | NA   | NA       | 3.515 | 0.65 |
| 404-1 | DLBCL | Aggressive lymphomas | 2C | MYD88 KMT2D                            | 2C-CT       | MYD88 KMT2D  | NA   | NA       | 2.654 | 0.79 |
| 407-1 | DLBCL | Aggressive lymphomas | 2C | KRAS FBXW7                             | 2C-R1       | KRAS         | 2D-P | BIRC3    | 4.339 | 0.17 |
| 437-1 | DLBCL | Aggressive lymphomas | 3  | MAPK1 LYN GAD2 KDR BTG1 BIRC6 NCOR1 AR | NA          | NA           | NA   | NA       | 1.542 | 0    |
| 490-1 | DLBCL | Aggressive lymphomas | 2D | TNFRSF14                               | NA          | NA           | 2D-P | TNFRSF14 | 4.088 | 0.78 |
| 503-1 | AITL  | Aggressive lymphomas | 2C | TET2                                   | 2C-S2 2C-R2 | TET2         | NA   | NA       | 0.215 | 0.03 |

|       |      |                    |    |                               |       |                       |      |      |       |      |
|-------|------|--------------------|----|-------------------------------|-------|-----------------------|------|------|-------|------|
| 024-1 | FL   | Indolent lymphomas | 2C | LRP1B EZH2                    | 2C-R1 | LRP1B                 | NA   | NA   | 3.55  | 1.01 |
| 026-1 | FL   | Indolent lymphomas | 2C | KMT2D CREBBP                  | 2C-CT | KMT2D CREBBP          | NA   | NA   | 1.004 | 0.18 |
| 028-1 | FL   | Indolent lymphomas | NA | NA                            | NA    | NA                    | NA   | NA   | 0.108 | 0    |
| 032-1 | LPL  | Indolent lymphomas | 2C | MYD88                         | 2C-CT | MYD88                 | NA   | NA   | 0.717 | 0.58 |
| 033-1 | NHL  | Indolent lymphomas | 2C | TP53                          | 2C-S1 | TP53                  | 2D-P | TP53 | 0.753 | 0.08 |
| 099-1 | LPL  | Indolent lymphomas | 2C | MYD88 ARID1A<br>CXCR4         | 2C-CT | MYD88 ARID1A<br>CXCR4 | NA   | NA   | 0.789 | 0.35 |
| 117-1 | FL   | Indolent lymphomas | 2C | EZH2 CREBBP<br>KMT2D          | 2C-R2 | EZH2                  | NA   | NA   | 0.488 | 0    |
| 133-1 | NHL  | Indolent lymphomas | 3  | ARAF CD74-RALYL<br>CLK1-CXCR4 | NA    | NA                    | NA   | NA   | 1     | 0.05 |
| 160-1 | FL   | Indolent lymphomas | 2C | TP53 KMT2D<br>CREBBP SRSF2    | 2C-S1 | TP53                  | NA   | NA   | 1.148 | 0.4  |
| 184-1 | SMZL | Indolent lymphomas | 2C | ATM CDKN2A                    | 2C-CT | ATM CDKN2A            | NA   | NA   | 0.968 | 0.82 |
| 206-1 | SMZL | Indolent lymphomas | 2C | MYD88                         | 2C-CT | MYD88                 | NA   | NA   | 0.729 | 0    |
| 217-1 | NHL  | Indolent lymphomas | 2C | TP53                          | 2C-S1 | TP53                  | 2D-P | TP53 | 0.948 | 0.03 |
| 222-1 | LPL  | Indolent lymphomas | 2C | MYD88                         | 2C-CT | MYD88                 | NA   | NA   | 0.656 | 0    |
| 230-1 | NHL  | Indolent lymphomas | NA | NA                            | NA    | NA                    | NA   | NA   | 0     | 0    |
| 240-1 | FL   | Indolent lymphomas | 2C | KMT2D EZH2                    | 2C-R2 | EZH2                  | NA   | NA   | 2.69  | 0.14 |
| 248-1 | NHL  | Indolent lymphomas | 2C | TP53                          | 2C-S1 | TP53                  | 2D-P | TP53 | 0.547 | 0    |
| 258-1 | CFCL | Indolent lymphomas | 2C | EP300 EZH2                    | 2C-R2 | EZH2                  | NA   | NA   | 1.865 | 0.29 |

|       |     |                      |    |                                              |       |              |      |      |       |      |
|-------|-----|----------------------|----|----------------------------------------------|-------|--------------|------|------|-------|------|
| 277-1 | FL  | Indolent lymphomas   | 2C | KMT2D MTAP                                   | 2C-CT | KMT2D        | NA   | NA   | 1.47  | 0.41 |
| 299-1 | FL  | Indolent lymphomas   | 2C | EZH2 KMT2D                                   | 2C-R2 | EZH2         | NA   | NA   | 0.861 | 0    |
| 317-1 | FL  | Indolent lymphomas   | 2C | KMT2D CREBBP                                 | 2C-CT | KMT2D CREBBP | NA   | NA   | 1.578 | 0.04 |
| 321-3 | FL  | Indolent lymphomas   | 2C | KMT2D SRSF2<br>CREBBP                        | 2C-R2 | SRSF2        | NA   | NA   | 2.626 | 0.43 |
| 350-1 | NHL | Indolent lymphomas   | 3  | KLF2 REL PTPRD<br>BCL11A                     | NA    | NA           | NA   | NA   | 0.61  | 0.11 |
| 412-1 | NHL | Indolent lymphomas   | 2C | MYD88                                        | 2C-CT | MYD88        | NA   | NA   | 1.112 | 0.08 |
| 425-1 | LPL | Indolent lymphomas   | 2C | MYD88 CXCR4                                  | 2C-CT | MYD88 CXCR4  | NA   | NA   | 1.004 | 0.05 |
| 435-1 | WM  | Indolent lymphomas   | 2C | MYD88                                        | 2C-CT | MYD88        | NA   | NA   | 1.04  | 0.19 |
| 438-1 | NHL | Indolent lymphomas   | 2C | TP53                                         | 2C-S1 | TP53         | 2D-P | TP53 | 0.143 | 0    |
| 439-1 | MCL | Indolent lymphomas   | 2C | ATM CDKN2A<br>MYD88 CCND1<br>NRAS LRP1B      | 2C-R1 | NRAS         | NA   | NA   | 1.399 | 0.86 |
| 448-1 | NHL | Indolent lymphomas   | 2C | EP300                                        | 2C-CT | EP300        | NA   | NA   | 1.757 | 0.32 |
| 454-1 | WM  | Indolent lymphomas   | 2C | MYD88                                        | 2C-CT | MYD88        | NA   | NA   | 0.789 | 0.94 |
| 458-1 | LPL | Indolent lymphomas   | 2C | CXCR4 MYD88                                  | 2C-CT | CXCR4 MYD88  | NA   | NA   | 0.215 | 0.02 |
| 466-1 | MCL | Indolent lymphomas   | 2C | TP53                                         | 2C-S1 | TP53         | 2D-P | TP53 | 1.459 | 0.05 |
| 003-1 | MM  | Plasma cell diseases | 2C | NRAS                                         | 2C-R1 | NRAS         | NA   | NA   | 1.202 | 0.01 |
| 023-1 | MM  | Plasma cell diseases | 3  | BARD1 OLAH<br>NFKB2 FGF8 B2M-<br>ELK2AP BRDT | NA    | NA           | NA   | NA   | 2.845 | 0.3  |

|       |    |                      |    |                            |       |      |    |    |       |      |
|-------|----|----------------------|----|----------------------------|-------|------|----|----|-------|------|
| 027-1 | MM | Plasma cell diseases | 3  | TBC1D13-BCL7A<br>NFKB2     | NA    | NA   | NA | NA | 0.864 | 0.21 |
| 085-1 | MM | Plasma cell diseases | 2C | BRAF                       | 2C-S1 | BRAF | NA | NA | 1.841 | 0.53 |
| 115-1 | MM | Plasma cell diseases | 2C | NRAS NTRK3                 | 2C-R1 | NRAS | NA | NA | 4.396 | 0.94 |
| 127-1 | MM | Plasma cell diseases | 2C | KRAS BRAF                  | 2C-R1 | KRAS | NA | NA | 1.901 | 0.37 |
| 135-1 | MM | Plasma cell diseases | 2C | KRAS                       | 2C-R1 | KRAS | NA | NA | 3.622 | 0.31 |
| 156-1 | MM | Plasma cell diseases | 2C | NRAS                       | 2C-R1 | NRAS | NA | NA | 2.735 | 0.17 |
| 159-1 | MM | Plasma cell diseases | 2C | KRAS                       | 2C-R1 | KRAS | NA | NA | 1.969 | 0.1  |
| 221-1 | MM | Plasma cell diseases | 3  | PREX2 IRS4                 | NA    | NA   | NA | NA | 0.584 | 0.26 |
| 228-1 | MM | Plasma cell diseases | 3  | CCND1 CLIP1<br>CDH1 CDKN1A | NA    | NA   | NA | NA | 1.349 | 0.01 |
| 365-1 | MM | Plasma cell diseases | 2C | TP53                       | 2C-S1 | TP53 | NA | NA | 3.012 | 1.5  |
| 384-1 | MM | Plasma cell diseases | 3  | IKBKB ALPP                 | NA    | NA   | NA | NA | 0.323 | 0.05 |
| 453-1 | MM | Plasma cell diseases | 2C | CUX1-BRAF                  | NA    | NA   | NA | NA | 2.188 | 0.51 |
| 453-2 | MM | Plasma cell diseases | 2C | CUX1-BRAF                  | NA    | NA   | NA | NA | 2.48  | 0.25 |

1A-S1 = Biomarker predicts a response to FDA, EMA or PMDA approved therapies for this diagnosis, 1A-S2 = Biomarker included in professional guidelines is predictive of response to FDA, EMA or PMDA approved therapies for this diagnosis, 1A-R1 = Biomarker predicts resistance to FDA, EMA or PMDA approved therapies for this diagnosis, 1A-R2 = Biomarker included in professional guidelines is predictive of resistance to FDA, EMA or PMDA approved therapies for this diagnosis, 1B-S = Biomarker predicts a response to therapies for this diagnosis based on well-powered studies, 1B-R = Biomarker predicts resistance to therapies for this diagnosis based on well-powered studies, 1A-P = Biomarker included in professional guidelines is prognostic for this diagnosis, 1B-P = Biomarker is prognostic for this diagnosis based on well-powered studies, 1A-D = Biomarker included in professional guidelines is diagnostic for this diagnosis, 1B-D = Biomarker is diagnostic for this diagnosis based on well-powered studies, 2C-S1 = Biomarker is associated with response to FDA, EMA or PMDA approved therapies for a different diagnosis, 2C-S2 = Biomarker included in professional guidelines is associated with response to FDA, EMA or PMDA approved therapies for a different diagnosis, 2C-R1 = Biomarker is associated with resistance to FDA, EMA or PMDA approved therapies for a different diagnosis, 2C-R2 = Biomarker included in

professional guidelines is associated with resistance to FDA, EMA or PMDA approved therapies for a different diagnosis, 2C-CT = Biomarker serves as an inclusion criterion for one or more clinical trials, 2D-S = Biomarker shows plausible response based on case studies, 2D-R = Biomarker shows plausible response based on case studies, 2C-P = Biomarker is prognostic based on multiple small studies, 2D-P = Biomarker is plausibly prognostic for this diagnosis based on case studies, 2C-D = Biomarker is diagnostic based on multiple small studies, 2D-D = Biomarker is plausibly diagnostic for this diagnosis based on case studies, 3 = Biomarker has uncertain clinical significance and not known to be likely benign or benign, 4 = Biomarker is classified as likely benign based on the ACMG/AMP guidelines.
